# Supplementary material for: Association between particulate air pollution and hypertensive disorders in pregnancy: A retrospective cohort study
Source: PLoS Med. 2024 Apr 26;21(4):e1004395. doi: 10.1371/journal.pmed.1004395 (PMC11087068; doi:10.1371/journal.pmed.1004395)
Supplement: S1 STROBE Checklist — (DOCX) [file pmed.1004395.s001.docx]

STROBE Statement—Checklist of items that should be included in reports of ***cohort studies***

|  | Item No | Recommendation | Page No |
| --- | --- | --- | --- |
| **Title and abstract** | 1 | (*a*) Indicate the study’s design with a commonly used term in the title or the abstract | Page 1 Title |
| (*b*) Provide in the abstract an informative and balanced summary of what was done and what was found | Page 3 Abstract - Methods and findings |
| Introduction | | | |
| Background/rationale | 2 | Explain the scientific background and rationale for the investigation being reported | Page 5-7 Introduction |
| Objectives | 3 | State specific objectives, including any prespecified hypotheses | Page 7 Introduction |
| Methods | | | |
| Study design | 4 | Present key elements of study design early in the paper | Page 7-8 Methods - Study population |
| Setting | 5 | Describe the setting, locations, and relevant dates, including periods of recruitment, exposure, follow-up, and data collection | Page 7-8 Methods - Study population |
| Participants | 6 | (*a*) Give the eligibility criteria, and the sources and methods of selection of participants. Describe methods of follow-up | Page 7-8 Methods - Study population; Appendix B |
| (*b*)For matched studies, give matching criteria and number of exposed and unexposed |  |
| Variables | 7 | Clearly define all outcomes, exposures, predictors, potential confounders, and effect modifiers. Give diagnostic criteria, if applicable | Page 8-10 Methods - Outcome definition; Exposure assessment; Covariates; Appendix A |
| Data sources/ measurement | 8* | For each variable of interest, give sources of data and details of methods of assessment (measurement). Describe comparability of assessment methods if there is more than one group | Page 8-10 Methods - Outcome definition; Exposure assessment; Covariates |
| Bias | 9 | Describe any efforts to address potential sources of bias | Page 10-11 Methods - Statistical analysis |
| Study size | 10 | Explain how the study size was arrived at | Page 7-8 Methods - Study population |
| Quantitative variables | 11 | Explain how quantitative variables were handled in the analyses. If applicable, describe which groupings were chosen and why | Page 10-11 Methods - Statistical analysis |
| Statistical methods | 12 | (*a*) Describe all statistical methods, including those used to control for confounding | Page 10-11 Methods - Statistical analysis |
| (*b*) Describe any methods used to examine subgroups and interactions | Page 11 Methods - Statistical analysis |
| (*c*) Explain how missing data were addressed | Page 11 Methods - Statistical analysis; Table 1 |
| (*d*) If applicable, explain how loss to follow-up was addressed | NA |
| (*e*) Describe any sensitivity analyses | Page 11 Methods - Statistical analysis |
| Results | | |  |
| Participants | 13* | (a) Report numbers of individuals at each stage of study—eg numbers potentially eligible, examined for eligibility, confirmed eligible, included in the study, completing follow-up, and analysed | Page 12 Results; Table 1; Appendix B |
| (b) Give reasons for non-participation at each stage | Page 7-8 Methods - Study population; Page 12 Results; Table 1 |
| (c) Consider use of a flow diagram | Appendix B |
| Descriptive data | 14* | (a) Give characteristics of study participants (eg demographic, clinical, social) and information on exposures and potential confounders | Page 12 Results |
| (b) Indicate number of participants with missing data for each variable of interest | Table 1 |
| (c) Summarise follow-up time (eg, average and total amount) |  |
| Outcome data | 15* | Report numbers of outcome events or summary measures over time | Page 12 Results |

| Main results | 16 | (*a*) Give unadjusted estimates and, if applicable, confounder-adjusted estimates and their precision (eg, 95% confidence interval). Make clear which confounders were adjusted for and why they were included | Page 12-13 Results; Figure 1; Table 3 |
| --- | --- | --- | --- |
| (*b*) Report category boundaries when continuous variables were categorized | Page 12-13 Results; Table 1; Table 2 |
| (*c*) If relevant, consider translating estimates of relative risk into absolute risk for a meaningful time period |  |
| Other analyses | 17 | Report other analyses done—eg analyses of subgroups and interactions, and sensitivity analyses | Page 13-14 Results; Figure 2; Appendix C-E |
| Discussion | | | |
| Key results | 18 | Summarise key results with reference to study objectives | Page 14 Discussion; Page 20 Conclusion |
| Limitations | 19 | Discuss limitations of the study, taking into account sources of potential bias or imprecision. Discuss both direction and magnitude of any potential bias | Page 19 Discussion - Study limitation and strength |
| Interpretation | 20 | Give a cautious overall interpretation of results considering objectives, limitations, multiplicity of analyses, results from similar studies, and other relevant evidence | Page 15-18 Discussion |
| Generalisability | 21 | Discuss the generalisability (external validity) of the study results | Page 16-19 Discussion |
| Other information | | | |
| Funding | 22 | Give the source of funding and the role of the funders for the present study and, if applicable, for the original study on which the present article is based | Page 20 Acknowledgements |

*Give information separately for exposed and unexposed groups.

**Note:** An Explanation and Elaboration article discusses each checklist item and gives methodological background and published examples of transparent reporting. The STROBE checklist is best used in conjunction with this article (freely available on the Web sites of PLoS Medicine at http://www.plosmedicine.org/, Annals of Internal Medicine at http://www.annals.org/, and Epidemiology at http://www.epidem.com/). Information on the STROBE Initiative is available at http://www.strobe-statement.org.
